# Supplementary material
Source: publisher figshare collection journal article supplement (https://wiley.figshare.com/articles/dataset/_/3567795)
Supplement: Supplementary file 1 [file 1 › appendix-A.htm]

Ecological Archives M081-018-A1


### *Ecological Archives* M081-018-A1

### Anthony R. Ives and Matthew R. Helmus. 2011. Generalized linear mixed models for phylogenetic analyses of community structure. *Ecological Monographs* 81:511–525.

Appendix A. Derivation of σ2repulseΣrepulse.

> View / download PDF.

---


[Back to M081-018]
